# Supplementary material
Source: publisher figshare collection journal article supplement (https://acs.figshare.com/ndownloader/files/4440352)
Supplement: Supplementary file 1 [file 4440352]

# Supporting Information

## Isostructural Single-Chain and Single-Molecule Magnets

*Patrick L. Feng<sup>†</sup> and David N. Hendrickson<sup>\*,†</sup>*

Department of Chemistry and Biochemistry, University of California, San Diego, La

Jolla, CA 92093-0358

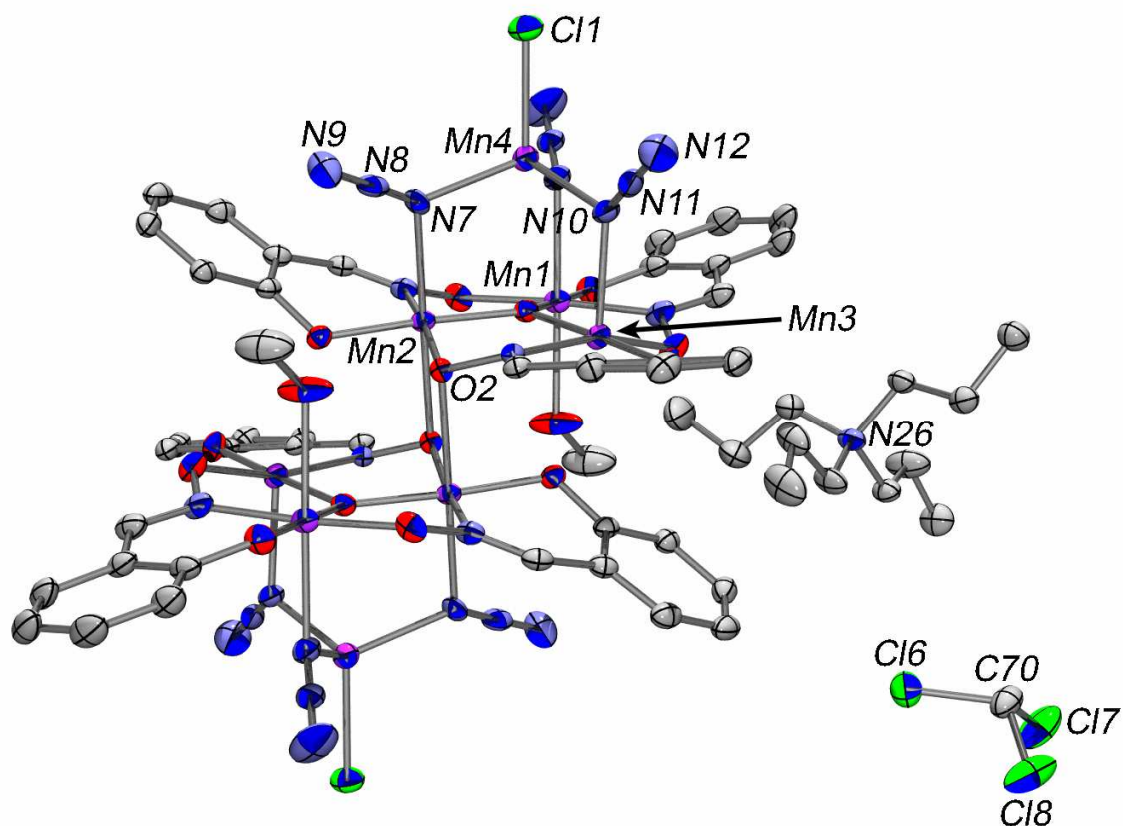

**Figure S1.** Labeled ORTEP for complex **3** at the 50% probability level.

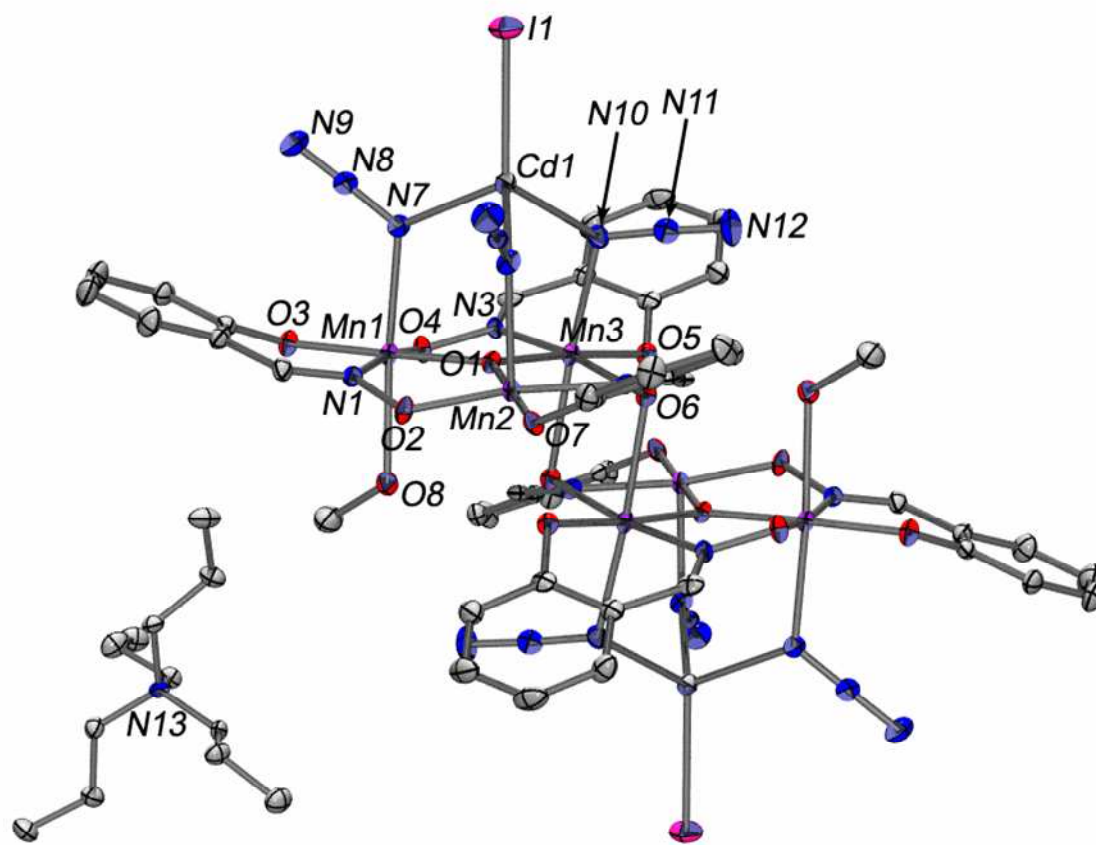

**Figure S2.** Labeled ORTEP for complex **4** at the 50% probability level. MeOH solvate molecules have been omitted for clarity.

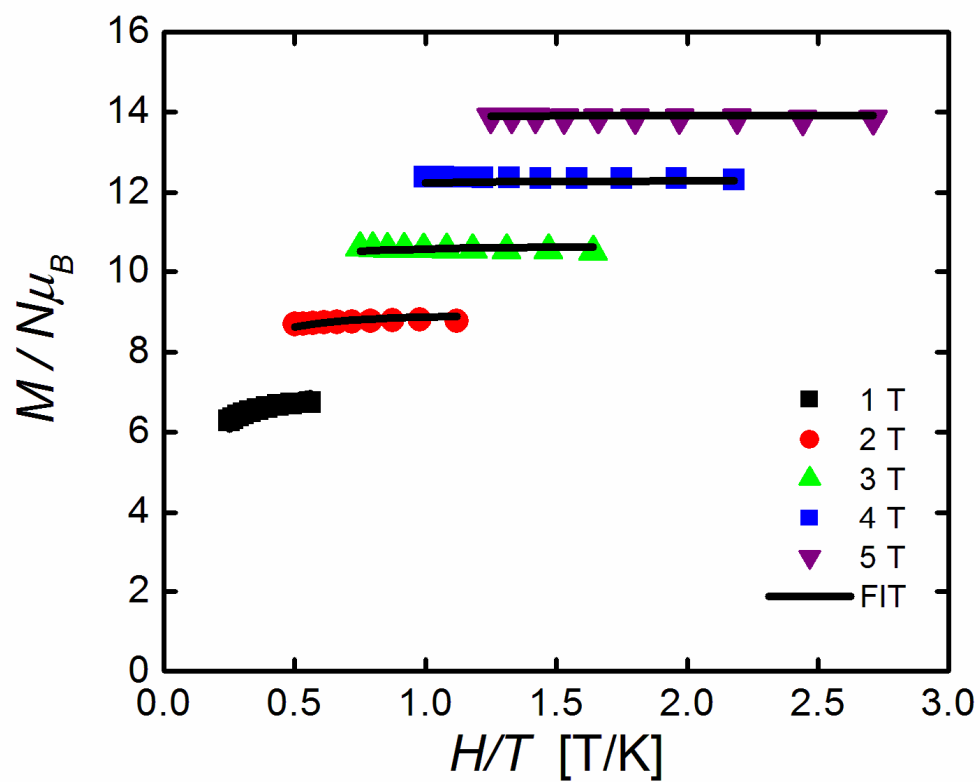

**Figure S3.** Least-squares fit of the reduced magnetization for complex **2**, taken from 1.8-4K at the fields shown.

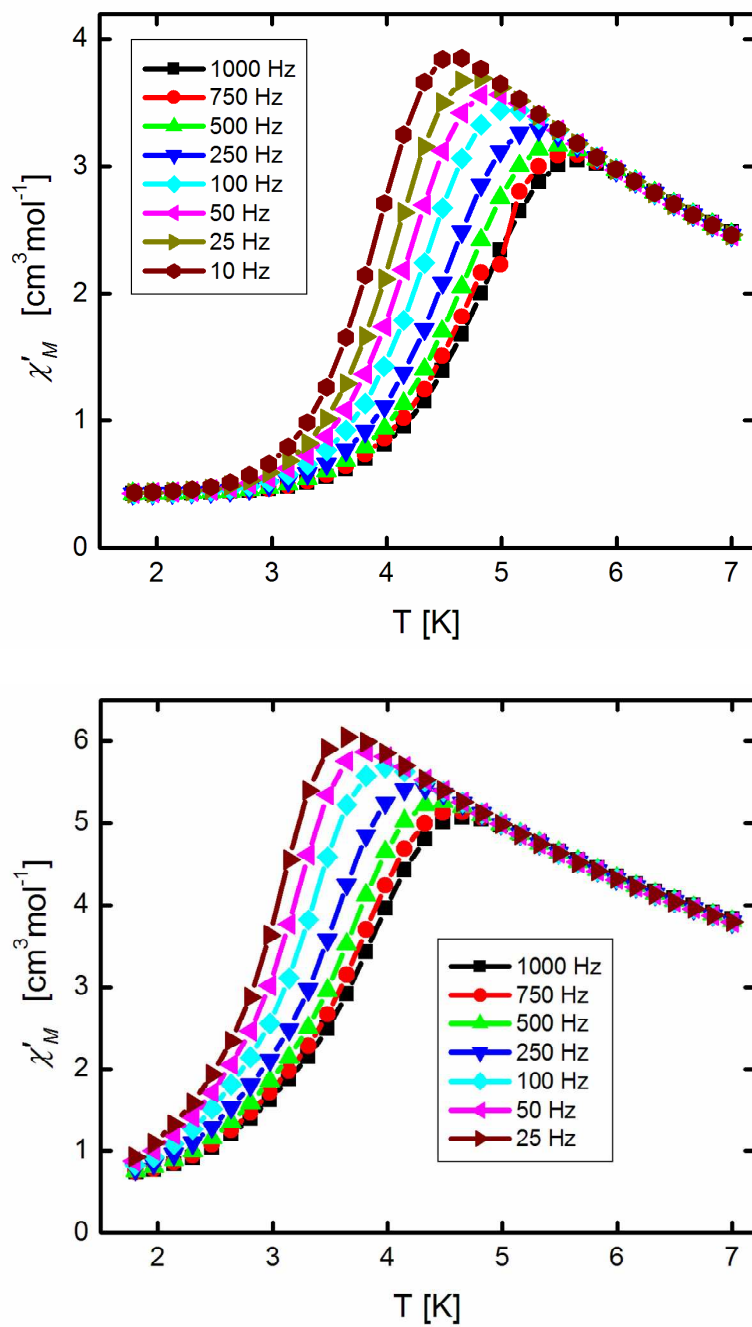

**Figure S4.** (top) In-phase magnetic susceptibility ( $\chi'_M$ ) for complex **1**, from 1.8-7 K and at 10-1000 Hz. (bottom) In-phase magnetic susceptibility ( $\chi'_M$ ) for complex **2**, from 1.8-7 K and at 25-1000 Hz.

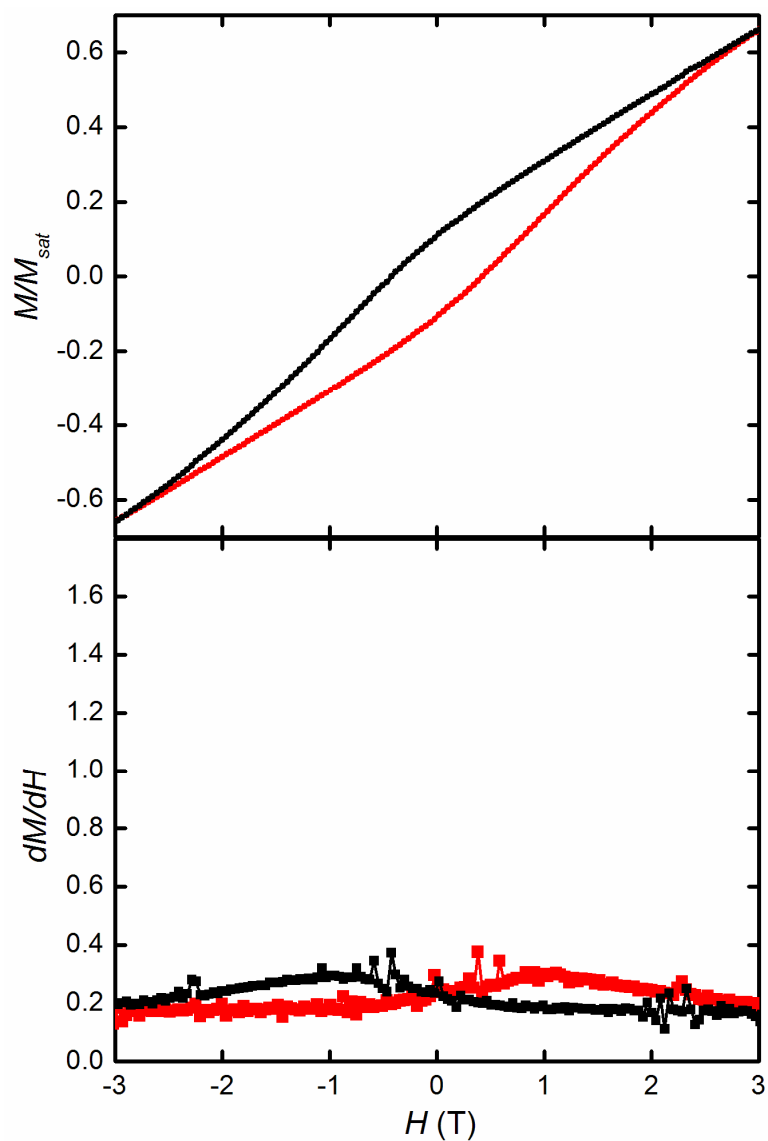

**Figure S5.** (top) Magnetization hysteresis loops collected at 1.8 K on a partially aligned polycrystalline sample of **1**, with the magnetic field applied along the net easy axis of the sample. (bottom) Derivative plot ( $dM/dH$ ) of the above magnetization hysteresis loop.

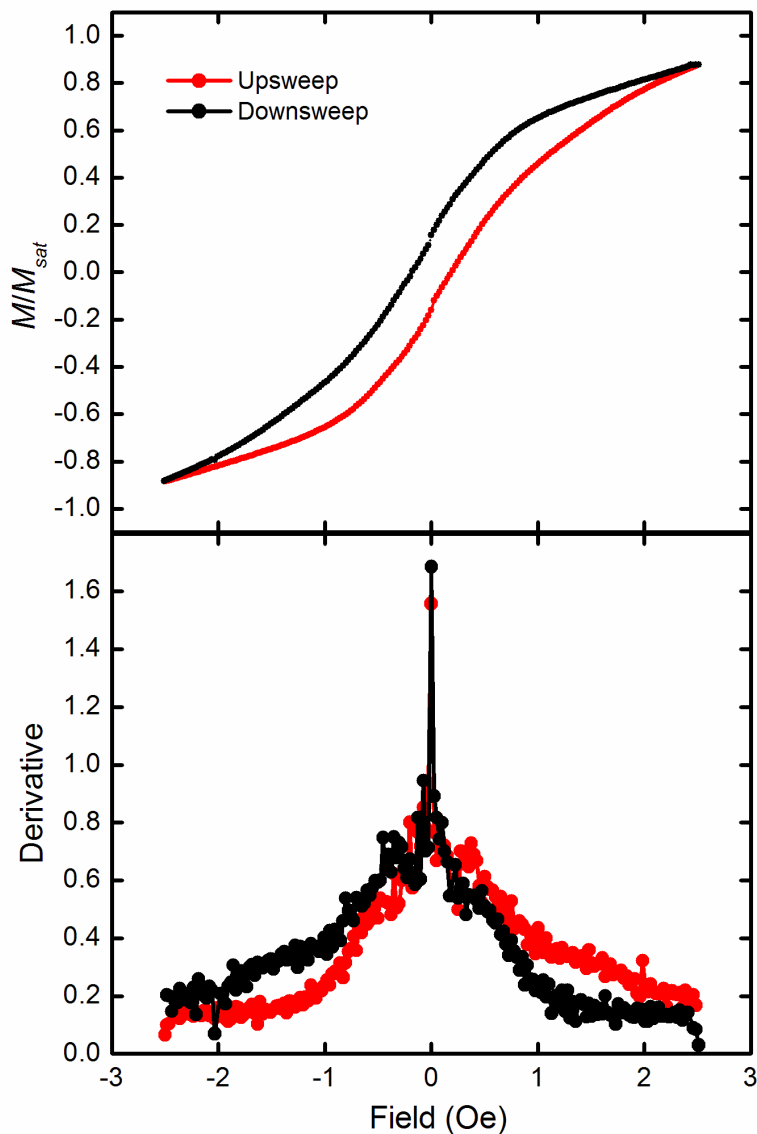

**Figure S6.** (top) Magnetization hysteresis loops collected at 1.8 K on a partially aligned polycrystalline sample of **2**, with the magnetic field applied along the net easy axis of the sample. (bottom) Derivative plot ( $dM/dH$ ) of the above magnetization hysteresis loop. The vertical step at zero applied field is reproducible and not an instrumental artifact, as confirmed via known reference samples.
